# Supplementary material
Source: PubMed Central journal article supplement (PMC3733093)

**FOR ONLINE-ONLY APPENDIX****Appendix A: Vignette excerpts illustrating symptom levels**

| Symptom Level        | Excerpt                                                                                                                                                                                                                                                                                                                                                                                                                                                                                                                                                                                                                                                                                                                                                                                                                                                                                                                                                                                                                                                                                                                                                                                                                                                                                                                                                                                                                                                                                                                                                                                                                                                                                                                                                                                                                                          |
|----------------------|--------------------------------------------------------------------------------------------------------------------------------------------------------------------------------------------------------------------------------------------------------------------------------------------------------------------------------------------------------------------------------------------------------------------------------------------------------------------------------------------------------------------------------------------------------------------------------------------------------------------------------------------------------------------------------------------------------------------------------------------------------------------------------------------------------------------------------------------------------------------------------------------------------------------------------------------------------------------------------------------------------------------------------------------------------------------------------------------------------------------------------------------------------------------------------------------------------------------------------------------------------------------------------------------------------------------------------------------------------------------------------------------------------------------------------------------------------------------------------------------------------------------------------------------------------------------------------------------------------------------------------------------------------------------------------------------------------------------------------------------------------------------------------------------------------------------------------------------------|
| No Psychosis         | <p>Mike is an 18-year-old African American male, currently enrolled in his senior year of high school. His parents brought him to see you after noticing “odd” behavior that caused them concern. Mike’s father reported that Mike had gotten into several fights in the last year and this worried them. Mike reported that he understood his parents’ concerns, but that the fights had been in self-defense, which the school and his teachers confirmed. Mike has been, according to all reporters, a consistently good student (A-B range) and is well-liked by his peers. He had recently won a high level chess tournament for which he was given recognition, and his mother said that this caused some of the students at his school to tease him. He reported to you that he was taking the situation “in stride”, knowing that he would soon be graduating, and did not feel he needed any help. He said that, in general, he maintains a positive outlook even when difficult situations arise. Throughout the interview, Mike was cooperative and communicated in a clear, effective manner about his situation. Mike and his mother reported that Mike has no history of alcohol or drug use. Medical tests have also not produced any significant findings.</p>                                                                                                                                                                                                                                                                                                                                                                                                                                                                                                                                                                   |
| Attenuated Psychosis | <p>Claire is a 17-year-old Caucasian female, currently enrolled in her junior year of high school. Her mother brought Claire to see you after noticing “odd” behavior that caused her concern. Claire has an uncle with schizophrenia. Her mother reported that Claire’s “strange” behavior has been occurring for approximately 5 months. Claire reported that once or twice per week she has heard a whispering voice when she’s in her room alone, but she was not sure where it was coming from or what it was saying. Claire felt it was possible that it might be a problem with her hearing, though it sounded real. During the interview, Claire at times needed to be redirected back to the topic and would bring up unrelated issues. Her mother reported that she was concerned because Claire hardly went out with her friends at all lately, and they were not calling the house anymore. Claire reported that she thinks her friends gossip about her behind her back, but she was not sure what they were saying. Claire’s mother had also been contacted by a school counselor who informed her that Claire’s academic performance was deteriorating dramatically from an A average to a C-D average. Claire and her mother both reported that Claire has no history of alcohol or drug use. Medical tests have also not produced any significant findings.</p>                                                                                                                                                                                                                                                                                                                                                                                                                                                                 |
| Psychosis            | <p>Diego is a 17-year-old Hispanic male, currently attending his junior year of high school. His mother brought him to see you after noticing “odd” behavior that caused her concern. Diego’s mother reported that his father has resided in a psychiatric hospital in Mexico for years for “strange” behavior including hearing voices. Diego’s mother reported that she would have brought him in sooner, but previously he had refused saying he did not want to talk to anyone about his experiences. She said that recently, he has not spoken much to anyone. She reported that approximately a year ago, he started being particularly picky about his food, and more recently blamed the neighbor of trying to poison him to take him “out of the picture”. His mother reported that there was no evidence for this and that the neighbor was a close family friend, but that Diego has become very angry in the past when she has attempted to challenge his beliefs. She also said that Diego is frequently agitated at school because he feels other teenagers are plotting against him. Diego initially refused to talk to you, but later opened up, saying in a slow, flat voice that he felt depressed, that the world was “so cruel”, and that he would “probably die soon” from other people’s actions. However, he could not provide specific details on why he thought this. He said that he found it very difficult to do anything and to express himself to others. Diego’s mother stated that he has been in all special education classes for several years, and that she was considering withdrawing him from classes as he was not progressing in his work. Diego reported that he very occasionally has one or two alcoholic beverages when with friends. Medical tests have not produced any significant findings.</p> |

**Appendix B: Figures illustrating practitioners’ ratings of treatment components**

Figure 1. Practitioner endorsements of treatment components as ‘helpful’

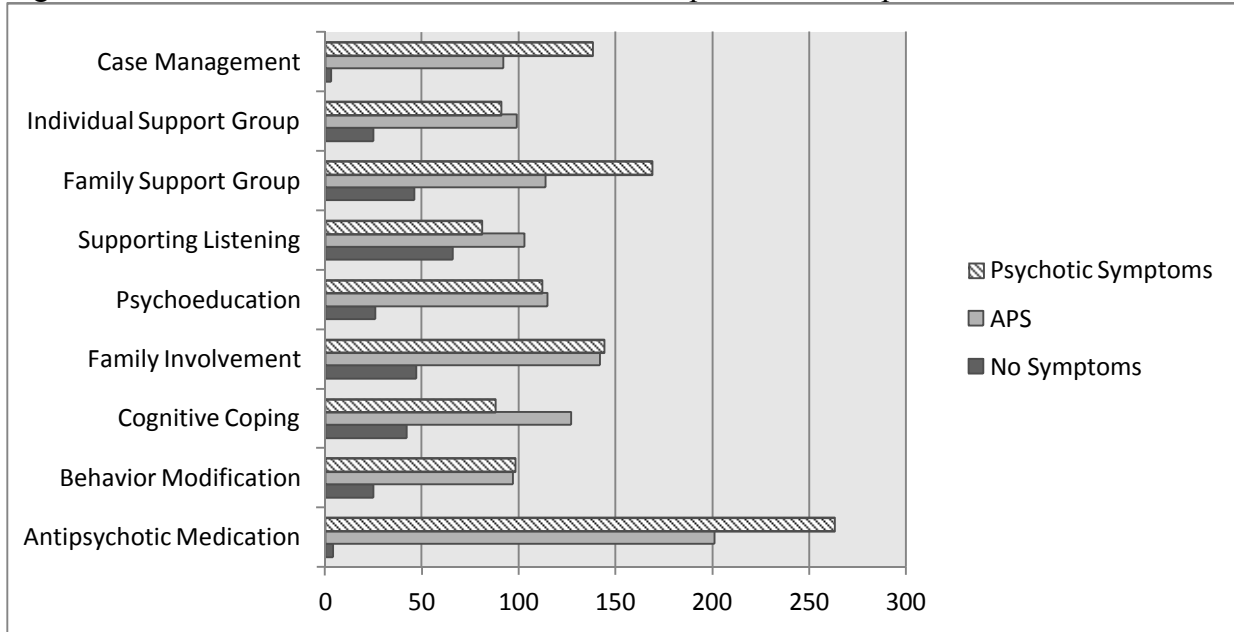

Figure 2. Practitioner endorsements of treatment components as ‘harmful’

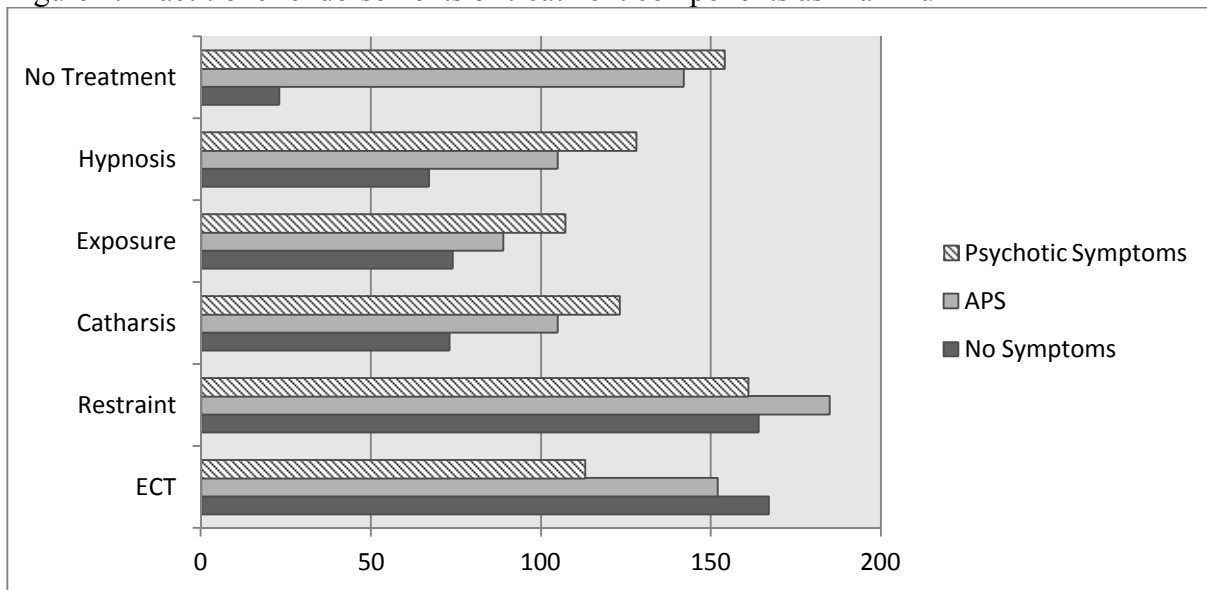

Supplement: NIHMS487092-supplement-supplement_1.pdf [file NIHMS487092-supplement-supplement_1.pdf]
